# Supplementary material for: The function of peptide-mimetic anionic groups and salt bridges in the antimicrobial activity and conformation of cationic amphiphilic copolymers
Source: Royal Society of Chemistry journal article supplement (doi:10.1039/d1ra02730a), 2021-01-01
Supplement: d1ra02730a1.pdf [file d1ra02730a1.pdf]

## Supplementary Information

### The Function of Peptide-Mimetic Anionic Groups and Salt Bridges in the Antimicrobial Activity and Conformation of Cationic Amphiphilic Copolymers

Authors: Rajani Bhat,<sup>1a</sup> Leanna L. Foster,<sup>2a</sup> Garima Rani,<sup>3,4a</sup> Satyavani Vemparala<sup>3,4\*</sup> and Kenichi Kuroda<sup>1,2\*</sup>

1) Department of Biologic and Materials Sciences & Prosthodontics, School of Dentistry, University of Michigan, Ann Arbor, Michigan 48109, United States

2) Macromolecular Science and Engineering Center, University of Michigan, Ann Arbor, Michigan 48109, United States

3) The Institute of Mathematical Sciences, C.I.T. Campus, Taramani, Chennai 600113, India

4) Homi Bhabha National Institute, Training School Complex, Anushakti Nagar, Mumbai 400094, India

<sup>a</sup> RB and LF and GR: Equal contribution

1. Monomer and Polymer characterization
  - a. NMR spectra
  - b. GPC traces
  - c. Hemolysis curves
  - d. Potentiometric titration curves
  - e. Table of Characterization of polymers
2. Atomistic MD simulations of model polymer M2
3. Solvent accessible surface area of M1

## 1. Monomer and Polymer characterization

### 1-1a $^1\text{H}$ NMR and $^{13}\text{C}$ NMR spectra of monomers and assignment of peaks

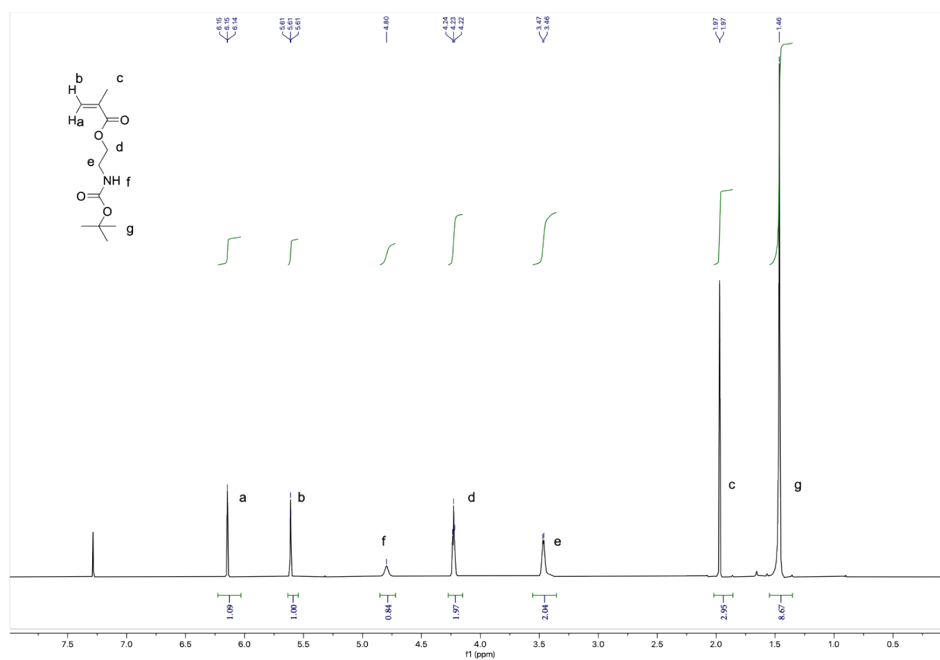

Figure S 1.  $^1\text{H}$  NMR spectrum of Boc-aminoethyl methacrylate monomer in  $\text{CDCl}_3$

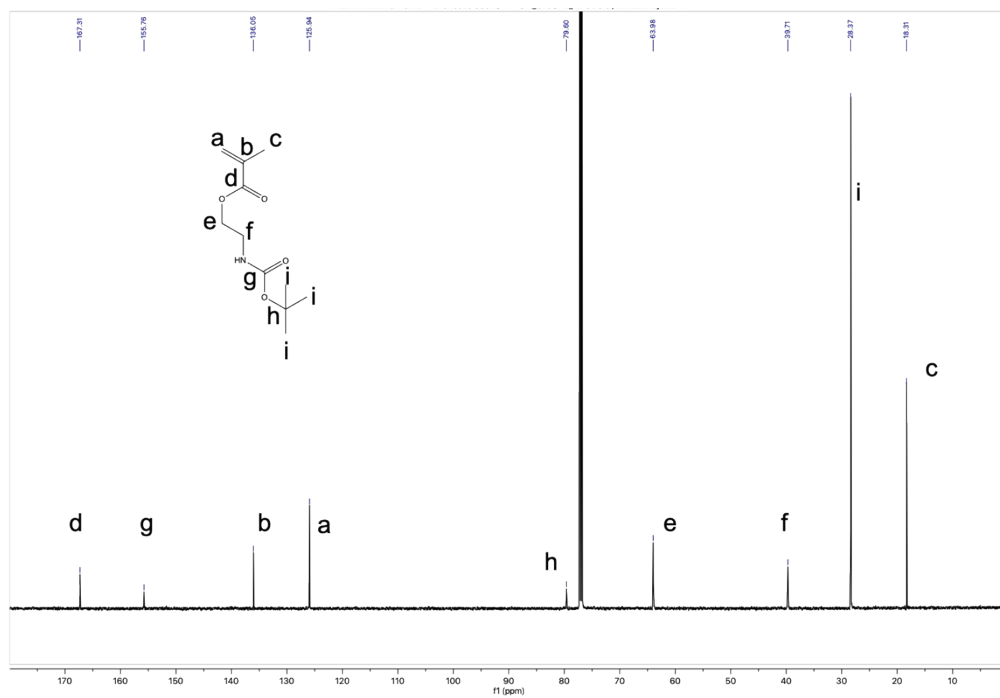

Figure S 2.  $^{13}\text{C}$  NMR spectrum of Boc-aminoethyl methacrylate monomer in  $\text{CDCl}_3$

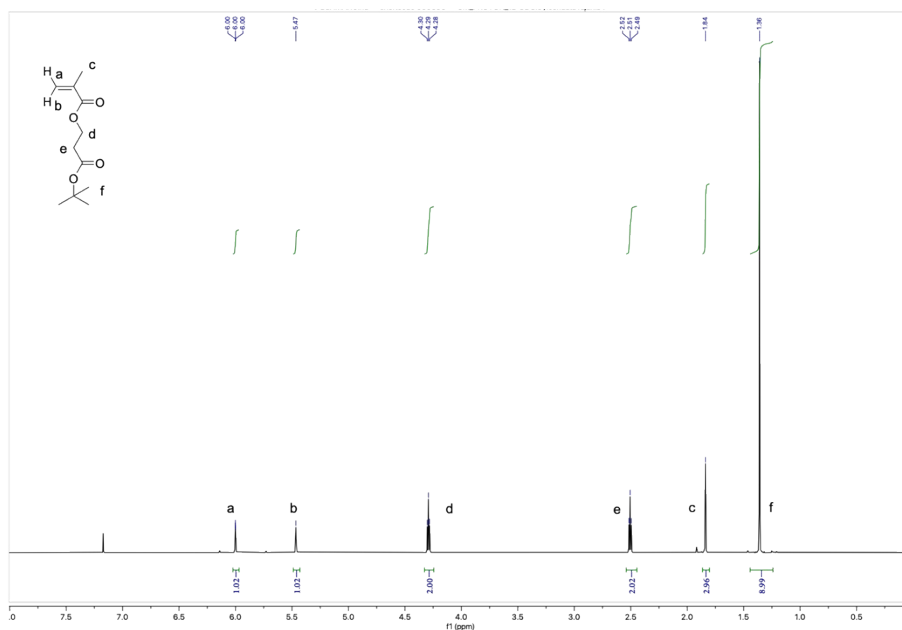

Figure S 3. <sup>1</sup>H NMR of *t* butyl propanoic acid methacrylate monomer

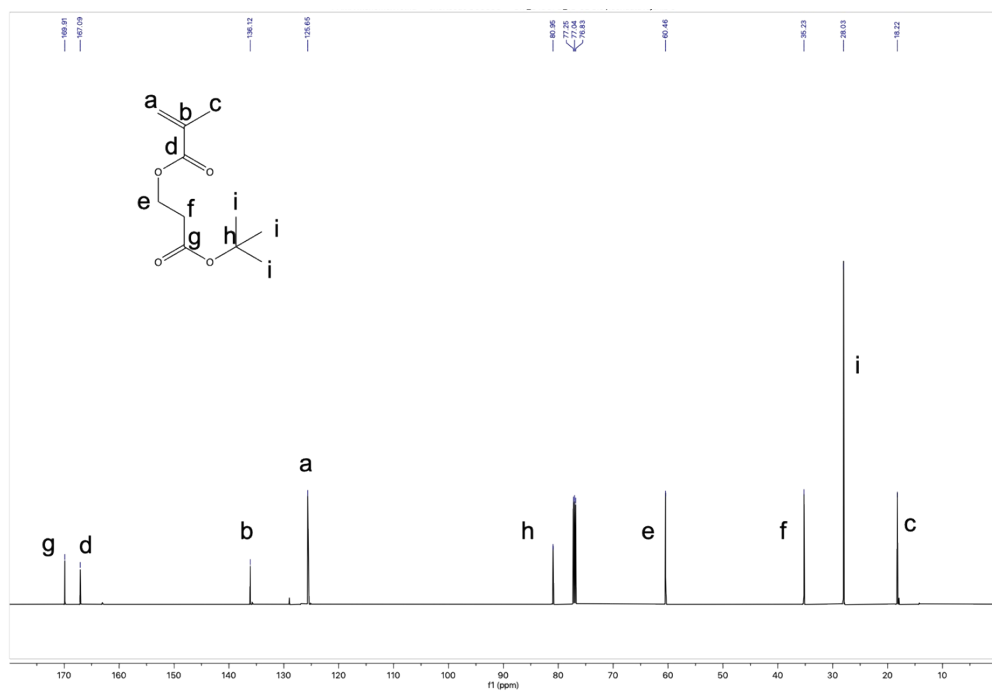

Figure S 4. <sup>13</sup>C NMR of *t* butyl propanoic acid methacrylate monomer

1-1a. <sup>1</sup>H NMR spectrum of AE<sub>39</sub>PA<sub>17</sub>E<sub>44</sub> in CD<sub>3</sub>OD as solvent and assignment of peaks

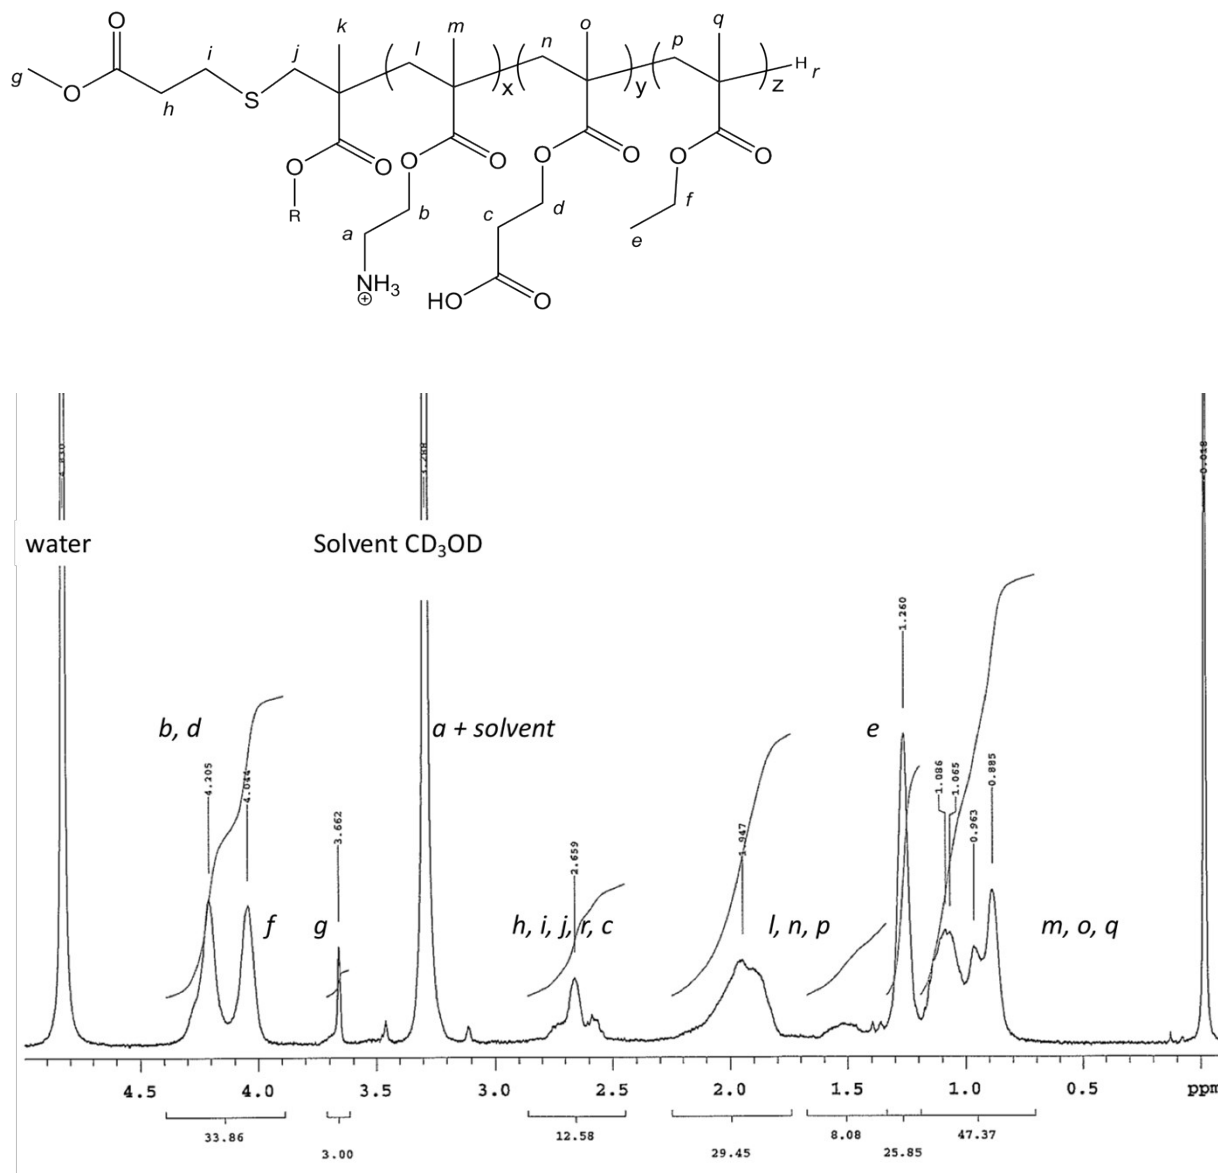

Figure S 5. <sup>1</sup>H NMR of AE<sub>39</sub>PA<sub>17</sub>E<sub>44</sub>

The DP and mol. % of monomers were determined as following:

$$DP = 33.86 / 2 (b, d, f) = 16.93$$

$$PAMA = [12.58 (c) - 7 (h, i, j, r)] / 33.86 (b, d, f) = 16.5\%$$

$$EMA = f / (b, d, f) = 26.5 \text{ mm} / (26.5 \text{ mm} + 33.5 \text{ mm}) * = 44 \% (* = \text{heights of integration curve})$$

$$AEMA = 100 \text{ mol. \%} - 44 \text{ mol. \% (EMA)} - 16.5 \text{ mol. \%} = 38.5 \text{ mol. \%}$$

1-2. Polymer GPC traces

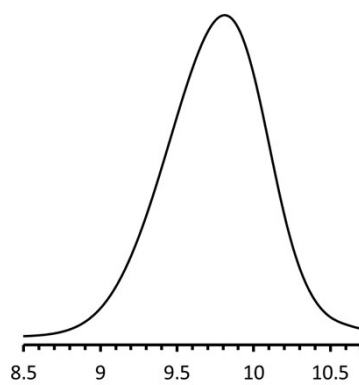

Figure S 6: SEC trace of  $AE_{00}PA_{55}E_{45}$  using RI detector

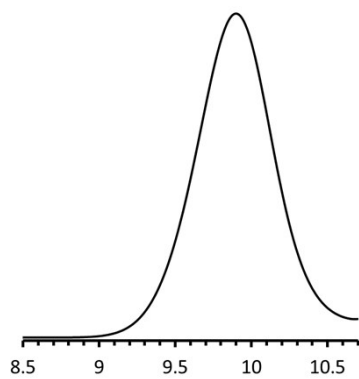

Figure S 7: SEC trace of  $AE_7PA_{47}E_{46}$  using RI detector

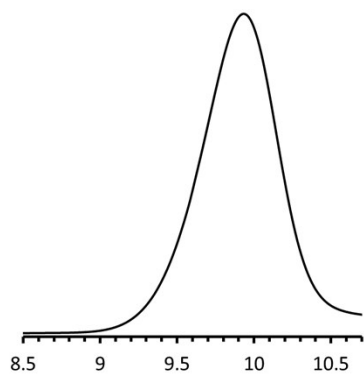

Figure S 8: SEC trace of  $AE_{21}PA_{42}E_{37}$  using RI detector

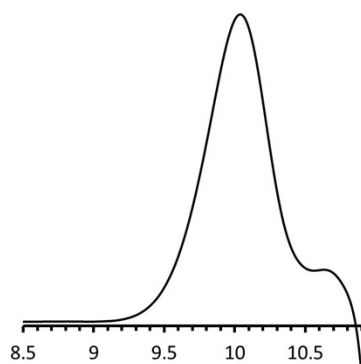

Figure S 9: SEC trace of  $AE_{29}PA_{27}E_{44}$  using RI detector

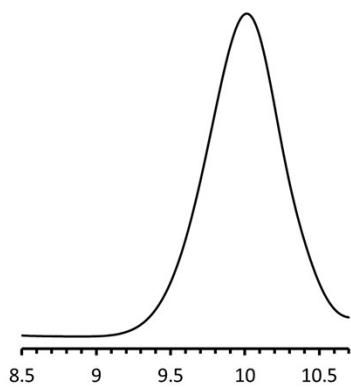

Figure S 10: SEC trace of  $AE_{37}PA_{24}E_{39}$  using RI detector

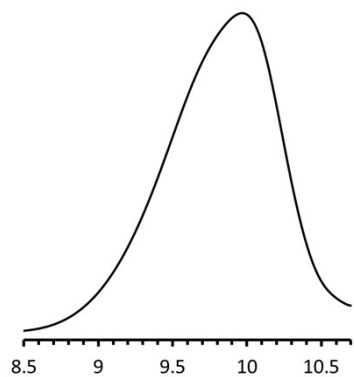

Figure S 11: SEC trace of  $AE_{39}PA_{22}E_{41}$  using RI detector

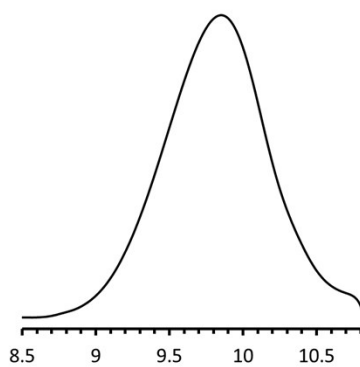

Figure S 12: SEC trace of  $AE_{39}PA_{17}E_{44}$  using RI detector

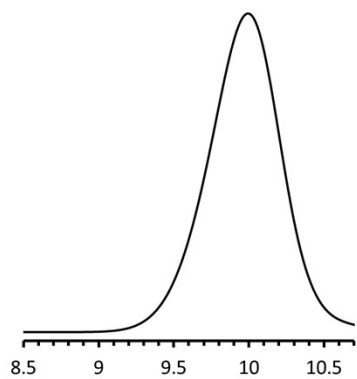

Figure S 13: SEC trace of  $AE_{46}PA_{12}E_{42}$  using RI detector

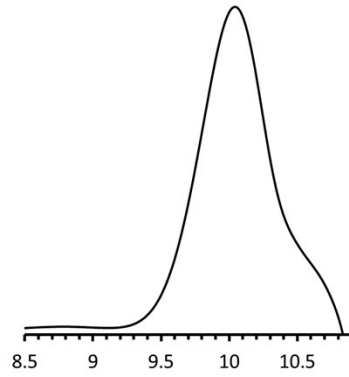

Figure S 14: SEC trace of AE<sub>59</sub>PA<sub>00</sub>E<sub>41</sub> using RI detector

### 1-3 Hemolysis Curves

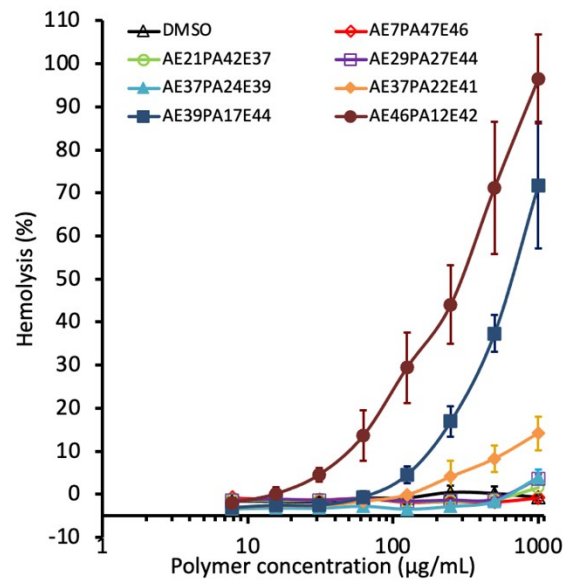

Figure S 15. Representative hemolysis curves. Each data point and error represent the average and standard deviation of triplicates



#### 1-4 Titration curves

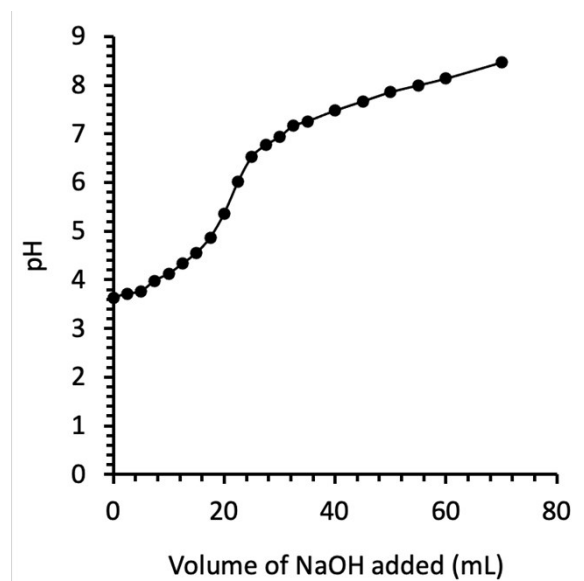

Figure S 16. Representative potentiometric titration curve of AE<sub>39</sub>PA<sub>17</sub>E<sub>44</sub> copolymer. The titration curve was measured at the polymer concentration of 0.5mg/mL due to its low availability.

Table S 1. Characterization of protected and deprotected copolymers with EMA 40 mol. %

| Polymer                                           | Feed composition<br>(mole%) |      |     | Protected copolymers <sup>a</sup> |      |      |      |       |              | Deprotected copolymers <sup>a</sup> |      |      |      |                  |                  |              |
|---------------------------------------------------|-----------------------------|------|-----|-----------------------------------|------|------|------|-------|--------------|-------------------------------------|------|------|------|------------------|------------------|--------------|
|                                                   | AEMA                        | PAMA | EMA | AEMA                              | PAMA | EMA  | DP   | Conv. | Yield<br>(%) | AEMA                                | PAMA | EMA  | DP   | $M_n^a$<br>w/TFA | $M_n$ w/o<br>TFA | Yield<br>(%) |
| AE <sub>0</sub> PA <sub>55</sub> E <sub>45</sub>  | 0                           | 60   | 40  | 0.0                               | 55.6 | 45.4 | 18.8 | -     | -            | 0                                   | 54.8 | 45.2 | 19.6 | 2770             | 2770             | 16           |
| AE <sub>7</sub> PA <sub>47</sub> E <sub>46</sub>  | 10                          | 50   | 40  | 7.6                               | 50.9 | 41.5 | 15.7 | 88.5  | 35           | 6.7                                 | 46.6 | 46.7 | 15.3 | 2330             | 2190             | 16           |
| AE <sub>21</sub> PA <sub>42</sub> E <sub>37</sub> | 20                          | 40   | 40  | 25.5                              | 38.9 | 35.6 | 15.6 | 91.6  | -            | 21.4                                | 41.6 | 37   | 14.8 | 2490             | 2130             | 28           |
| AE <sub>29</sub> PA <sub>27</sub> E <sub>44</sub> | 30                          | 30   | 40  | 30.5                              | 27.2 | 42.3 | 15.1 | -     | 58           | 29.4                                | 26.8 | 43.8 | 17.1 | 2930             | 2360             | 50           |
| AE <sub>37</sub> PA <sub>24</sub> E <sub>39</sub> | 40                          | 20   | 40  | 35.2                              | 22.7 | 42.1 | 15.2 | -     | -            | 36.6                                | 23.2 | 40.2 | 15.3 | 2780             | 2140             | 50           |
| AE <sub>37</sub> PA <sub>22</sub> E <sub>41</sub> | 35                          | 25   | 40  | 38.0                              | 22.5 | 39.5 | 14.8 | 97.4  | 72           | 37.3                                | 21.7 | 41.0 | 15.4 | 2740             | 2100             | 60           |
| AE <sub>39</sub> PA <sub>17</sub> E <sub>44</sub> | 40                          | 20   | 40  | 43.3                              | 15.9 | 40.8 | 15.9 | -     | 60           | 39.4                                | 16.5 | 44.1 | 16.9 | 3040             | 2290             | 55           |
| AE <sub>46</sub> PA <sub>12</sub> E <sub>42</sub> | 45                          | 15   | 40  | 45.2                              | 12.8 | 42.0 | 16.5 | 95.2  | 65           | 46.3                                | 12.1 | 41.6 | 18.6 | 3440             | 2480             | 58           |
| AE <sub>59</sub> PA <sub>0</sub> E <sub>41</sub>  | 60                          | 0    | 40  | 61.1                              | 0.0  | 38.9 | 14.8 | -     | 88           | 59.3                                | 0.0  | 40.7 | 14.4 | 2860             | 1900             | 81           |

a) Values determined by <sup>1</sup>H NMR

## 2. Atomistic MD simulations of model polymer M2

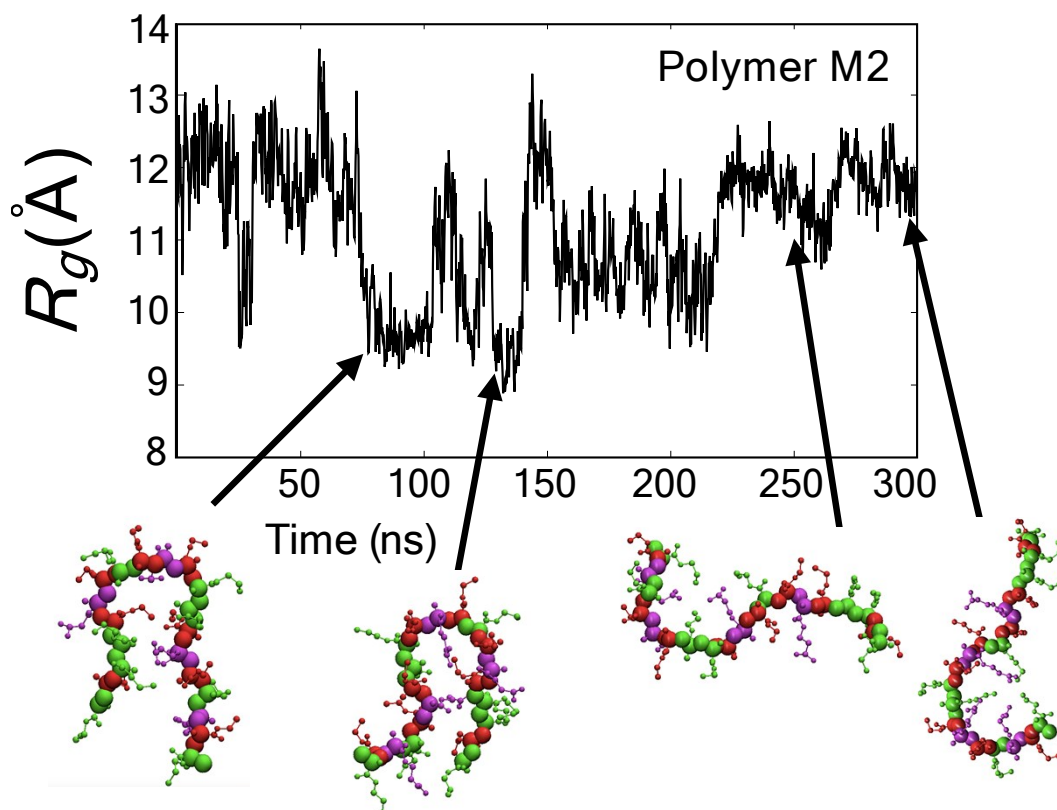

Figure S 17. Radius of gyration ( $R_g$ ) for the model polymer (M2) as a function of simulation time. Representative snapshots to illustrate the conformations of the polymers are also presented, with arrows indicating the corresponding simulation time and  $R_g$  values.

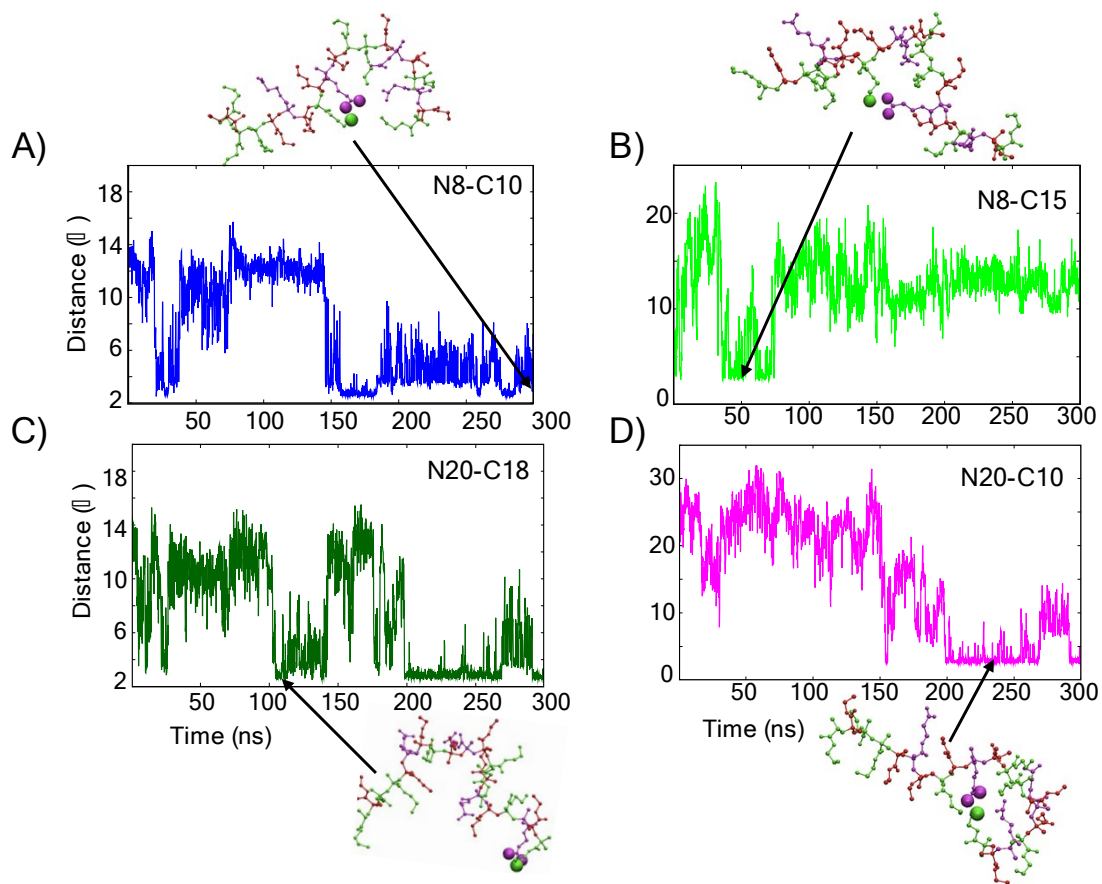

Figure S 18. Time evolution of distance between the nitrogen atom of  $\text{NH}_3^+$  in AEMA group and the carboxyl oxygen atoms of  $\text{COO}^-$ . A representative snapshot of the polymer is shown with arrows pointing to the corresponding distance between nitrogen (shown as green ball) and oxygen atoms (shown as magenta balls) and simulation time.

### 3. Solvent accessible surface area of M1

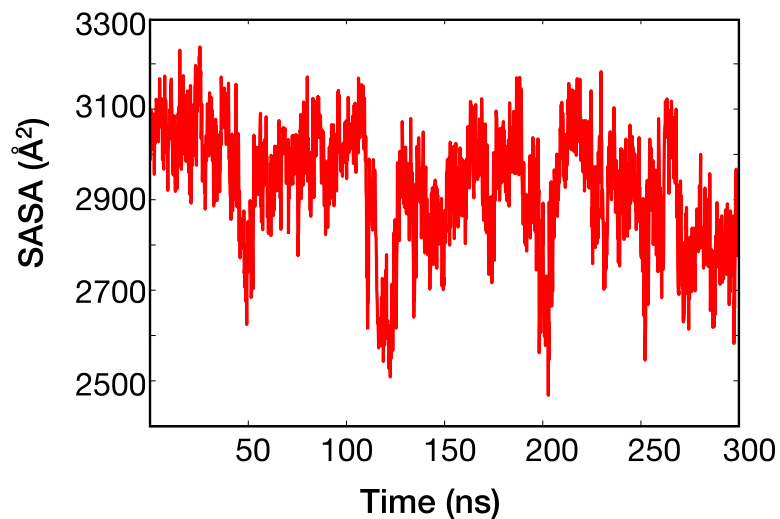

Figure S 19. Time evolution of SASA value of M1.

#### References

1. Stromstedt, A. A.; Pasupuleti, M.; Schmidtchen, A.; Malmsten, M., Evaluation of Strategies for Improving Proteolytic Resistance of Antimicrobial Peptides by Using Variants of EFK17, an Internal Segment of LL-37. *Antimicrob Agents Ch* 2009, 53 (2), 593-602.
